# Supplementary material for: Cbk1 kinase and Bck2 control MAP kinase activation and inactivation during heat shock
Source: PubMed Central journal article supplement — Mol Biol Cell. 2011 Dec 15;22(24):4892–907. doi: 10.1091/mbc.E11-04-0371 (PMC3237631; doi:10.1091/mbc.e11-04-0371), 2011-12-15
Supplement: supp_E11-04-0371_CombinedSupMats.pdf [file supp_E11-04-0371_CombinedSupMats.pdf]

SUPPLEMENTAL DATA: 1 TABLE, 4 FIGS, 2 MOVIES

SUPPLEMENTAL TABLE S-I. pMpk1/tMpk1 data for Figure 3

Heat shock (39°C)

| Time | WT    |      | <i>cbk1-8</i> |      | <i>bck2Δ</i> |      | <i>knr4Δ</i> |      | <i>sdp1Δ</i> |      | <i>bck1Δ</i> |
|------|-------|------|---------------|------|--------------|------|--------------|------|--------------|------|--------------|
|      | Ratio | SE   | Ratio         | SE   | Ratio        | SE   | Ratio        | SE   | Ratio        | SE   | Ratio        |
| 0    | 1.4   | 0.04 | 2.0           | 0.55 | 1.4          | 0.67 | 1.2          | 0.51 | 1.5          | 1.0  | 0.3          |
| 15   | 4.5   | 0.44 | 5.0           | 0.28 | 4.3          | 0.17 | 3.6          | 0.82 | 5.4          | 0.22 | 0.5          |
| 30   | 4.8   | 0.7  | 4.7           | 1.27 | 5.0          | 0.7  | 3.9          | 0.35 | 4.4          | 0.6  | 0.4          |
| 45   | 3.4   | 0.27 | 3.9           | 1.55 | 4.0          | 0.36 | 3.3          | 0.23 | 3.7          | 0.66 | 0.6          |
| 60   | 2.2   | 0.21 | 4.5           | 1.41 | 3.6          | 0.9  | 3.6          | 0.8  | 3.6          | 0.45 | 0.5          |
| 75   | 2.3   | 0.26 | 5.3           | 0.98 | 3.8          | 0.9  | 4.1          | 0.3  | 5.0          | 0.58 | 0.5          |
| 90   | 2.5   | 0.31 | 7.3           | 0.63 | 4.2          | 0.51 | 4.7          | 1.0  | 5.1          | 0.93 | 0.5          |
| 105  | 2.4   | 0.31 | 6.5           | 0.28 | 3.6          | 1.0  | 4.0          | 1.3  | 5.2          | 1.37 | 0.5          |
| 120  | 2.0   | 0.14 | 8.2           | 0.84 | 4.5          | 1.2  | 5.0          | 1.65 | 5.7          | 1.7  | 0.53         |

Caffeine

| Time | WT    |      | <i>cbk1-8</i> |       | <i>bck2Δ</i> |      | <i>knr4Δ</i> |     | <i>sdp1Δ</i> |      | <i>bck1Δ</i> |
|------|-------|------|---------------|-------|--------------|------|--------------|-----|--------------|------|--------------|
|      | Ratio | SE   | Ratio         | SE    | Ratio        | SE   | Ratio        | SE  | Ratio        | SE   | Ratio        |
| 0    | 0.8   | 0.06 | 2.4           | 0.05  | 1.5          | 0.55 | 2.6          | 2.1 | 2.5          | 0.41 | 0.2          |
| 15   | 1.0   | 0.02 | 1.8           | 0.06  | 1.8          | 0.7  | 3.5          | 1.8 | 1.7          | 0.31 | 0.3          |
| 30   | 2.0   | 0.55 | 3.7           | 0.25  | 2.8          | 1.1  | 4.6          | 3   | 2.4          | 0.36 | 0.3          |
| 45   | 3.5   | 0.17 | 5.5           | 0.41  | 4.6          | 1.5  | 6.0          | 4.7 | 4.3          | 0.3  | 0.2          |
| 60   | 4.5   | 1.3  | 9.1           | 0.4   | 7.4          | 0.6  | 7.0          | 4.6 | 3.8          | 1.0  | 0.4          |
| 75   | 3.8   | 1.1  | 7.7           | 0.26  | 9.3          | 1.7  | 8.0          | 4.0 | 3.6          | 0.43 | 0.3          |
| 90   | 3.3   | 1.3  | 7.0           | 0.52  | 9.8          | 2.2  | 9.7          | 3.2 | 3.0          | 0.33 | 0.3          |
| 105  | 3.0   | 1.0  | 6.0           | 1.0   | 8.2          | 2.7  | 9.2          | 4.7 | 3.8          | 1.0  | 0.4          |
| 120  | 2.0   | 0.4  | 5.4           | 1.0   | 6.7          | 2.3  | 11.0         | 3.7 | 3.0          | 0.75 | 0.4          |
| 135  | 1.7   | 0.43 | 5.4           | 0.86  | 4.8          | 2.2  | 12.7         | 2.4 | 2.1          | 0.3  | 0.4          |
| 150  | 1.4   | 0.4  | 6.0           | 0.09  | 4.1          | 2.6  | 15.7         | 2.3 | 1.9          | 0.45 | 0.3          |
| 165  | 1.0   | 0.09 | 6.6           | 0.033 | 3.6          | 2.8  | 10.5         | 1.6 | 1.4          | 0.23 | 0.4          |
| 180  | 0.85  | 0.06 | 5.0           | 0.01  | 3.4          | 2.7  | 7.7          | 1.3 | 1.1          | 0.2  | 0.4          |

## Supplemental Figure S1

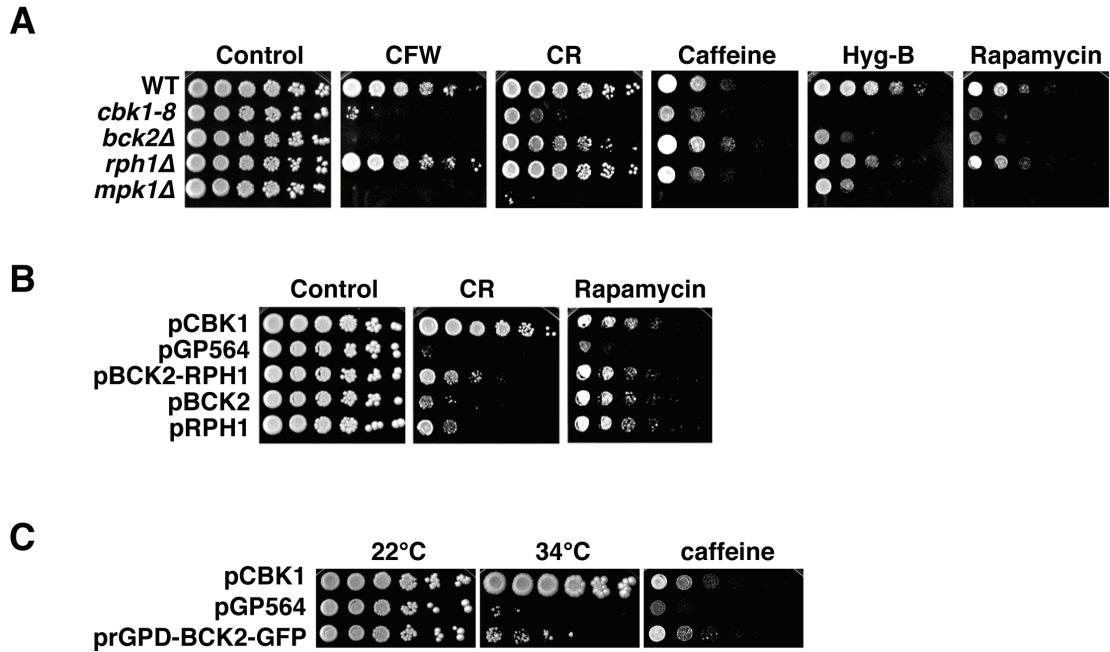

**Supplemental Figure S1. Comparative analysis of *cbk1-8*, *bck2Δ*, *rph1Δ* and *mpk1Δ* mutant phenotypes.** A) 10-fold dilution series of *cbk1-8*, *bck2Δ*, *rph1Δ* and *mpk1Δ* cells were grown on media containing 100 ug/ml Calcofluor White (CW), 100ug/ml Congo Red (CR), 15mM Caffeine, 50 ug/ml Hygromycin B (Hyg B) 1.2 nM Rapamycin. B) High copy BCK2, RPH1 and BCK2-RPH1 plasmids suppress the Congo Red and Rapamycin sensitivities of *cbk1-8* cells. pCBK1 and empty vector serve as positive and negative controls. C) 10-fold dilution series of *cbk1-8* cells containing a low copy plasmid of GPD-driven Bck2-GFP (pGPD-BCK2-GFP). Moderately overexpressed Bck2 suppresses the temperature sensitivity and caffeine sensitivity of *cbk1-8* cells. The yeast strains and plasmids are listed in Table I and II.

## Supplemental Figure S2

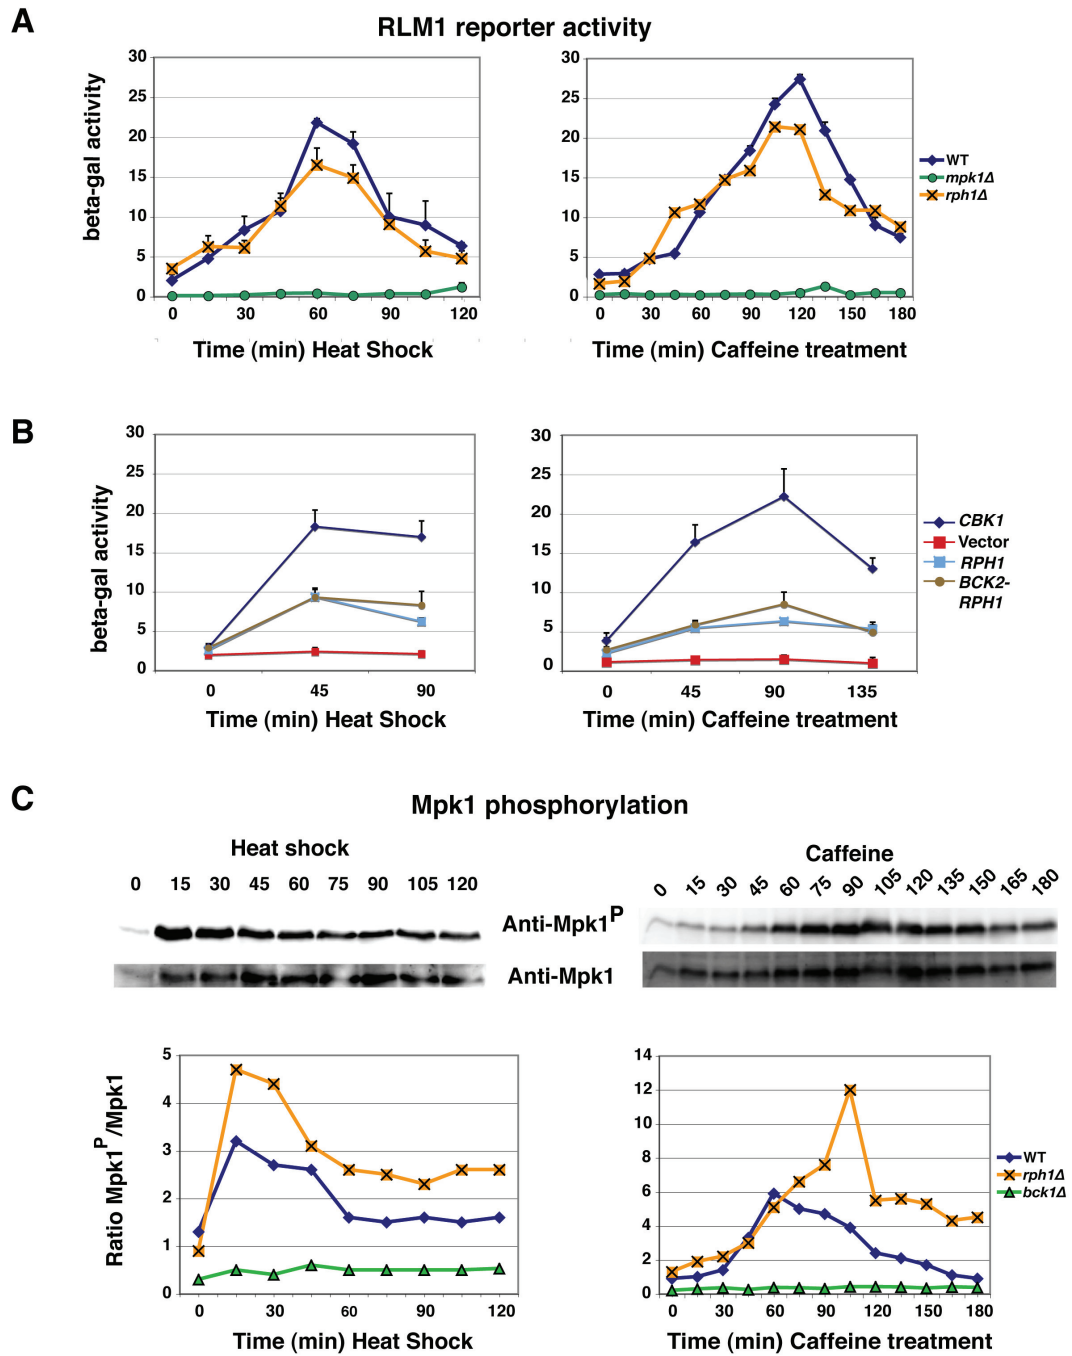

Supplemental Figure S2. Role of Rph1 in Rlm1 reporter activation. A) Rlm1 reporter activity from *rph1Δ* cells was quantified and plotted at the designated time points after initiating heat shock (left panel) and caffeine-treatment (right panel), as described

for **Fig. 2**. B) Rph1 overexpression via high copy plasmids partially restores RLM1 reporter activity in heat shocked (left panel) and caffeine-treated (right panel) *cbk1-8* cells. Positive and negative controls (cells containing pCBK1, empty vector) from parallel experiments (from **Fig. 2**) are included for reference. C) Rph1 is not essential for Mpk1 Thr<sup>190</sup>/Tyr<sup>192</sup> phosphorylation. Mpk1 Thr<sup>190</sup>/Tyr<sup>192</sup> phosphorylation levels in *rph1Δ* cells (FLY3278) were monitored by quantitative immunoblots at various times after heat shock initiation and caffeine treatment. The ratios of phospho-Mpk1 to total Mpk1 protein were plotted. Data from wild type and *bck1Δ* cells (from **Fig. 3**) were plotted as positive and negative controls.

## Supplemental Figure S3

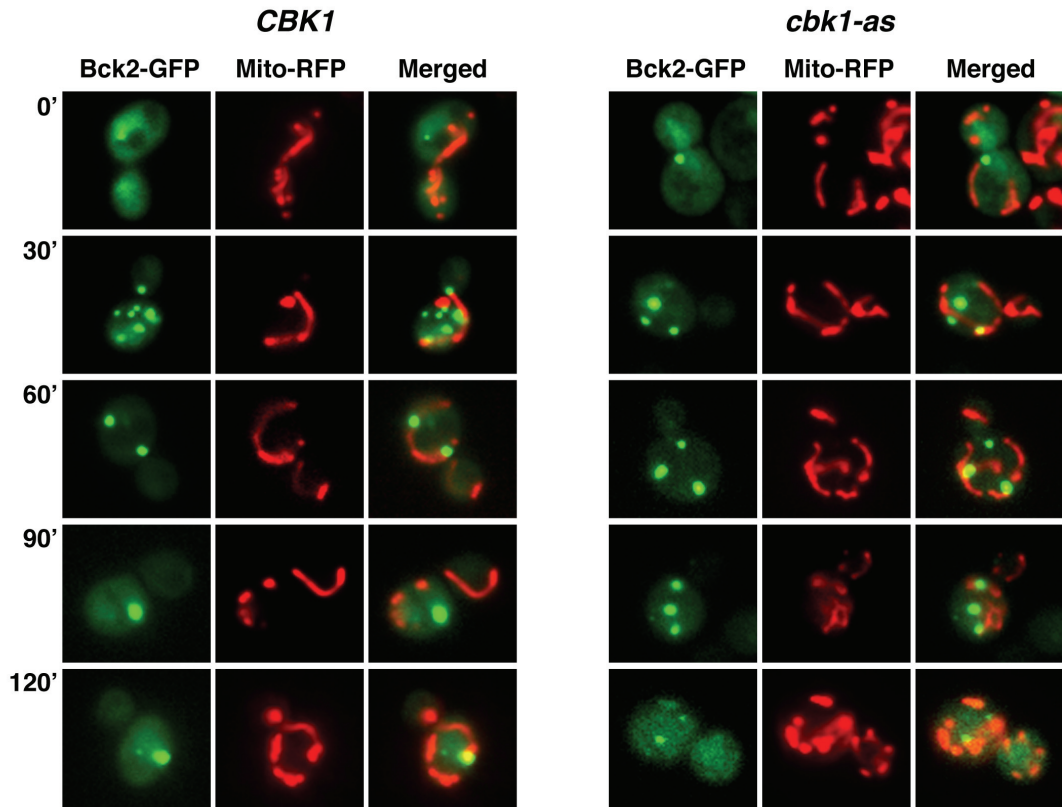

**Supplemental Figure S3. Colocalization of Bck2 and mitochondria during heat shock.** Parallel experiment to **Fig. 9A** showing the timing of Bck2 colocalization with mitochondria upon heat shock. Cells expressing Bck2-GFP and Mito-RFP (pHCRED) were treated and monitored as described for **Fig. 9A**. Heat shock and Cbk1 inhibition (1NA-PP1 addition) were done simultaneously in *cbk1-as* cells. All images represent single optical sections.

## Supplemental Figure S4

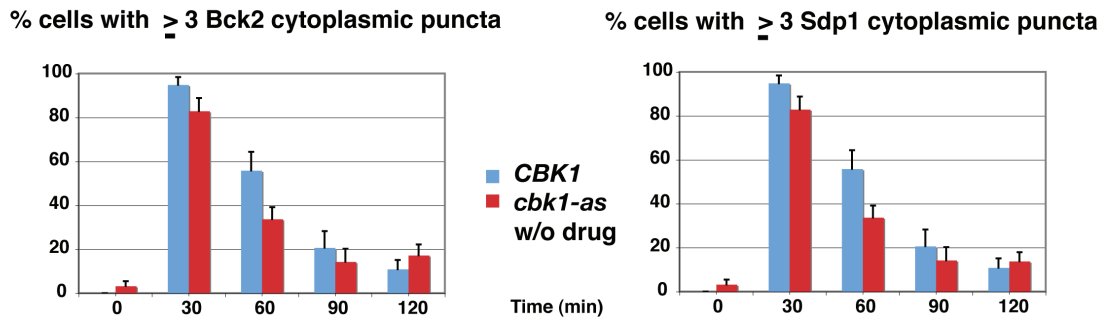

**Supplemental Figure S4. Additional controls for Fig. 9.** The percentage of Bck2 and Sdp1 puncta were quantified in heat shocked *cbk1-as* cells in the absence of 1NA-PP1. In the absence of 1NA-PP1, the phenotypes of *cbk1-as* cells are similar to that of wild type cells. Data from wild type cells (from **Fig. 9**) are included as a reference.

**Supplemental Movie 1.** The images from the experiment in **Fig. 5B** are presented as a movie (3 frames/second).

**Supplemental Movie 2.** Rotating images of the 3D model in **Fig. 7B**.
